# Supplementary material for: Potential of Single Pulse and Multiplexed Drift-Tube Ion Mobility Spectrometry Coupled to Micropillar Array Column for Proteomics Studies
Source: MDPI journal article supplement (doi:10.3390/ijms23147497), 2022-07-06
Supplement: s1 [file s1]

## Supplementary Materials

**Figure S1.** (a) Design of the analytical platform used in this study. (b) Connection between the  $\mu$ PAC and the calibration chip by the HPLC Chip-cube.

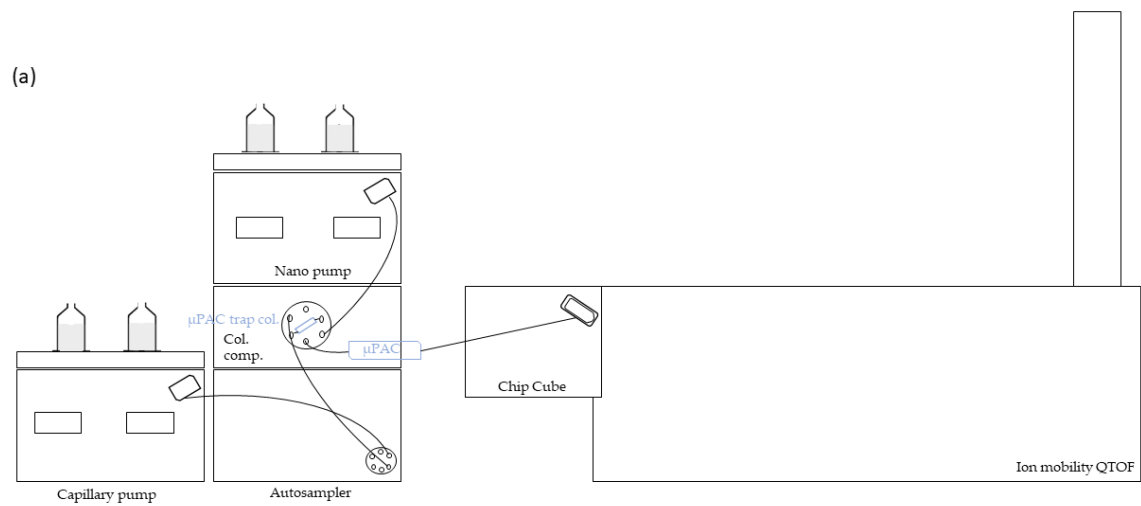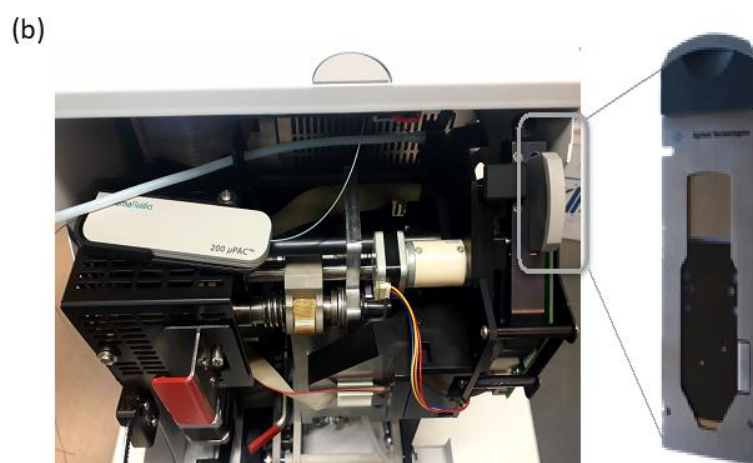

**Figure S2.** Data treatment process

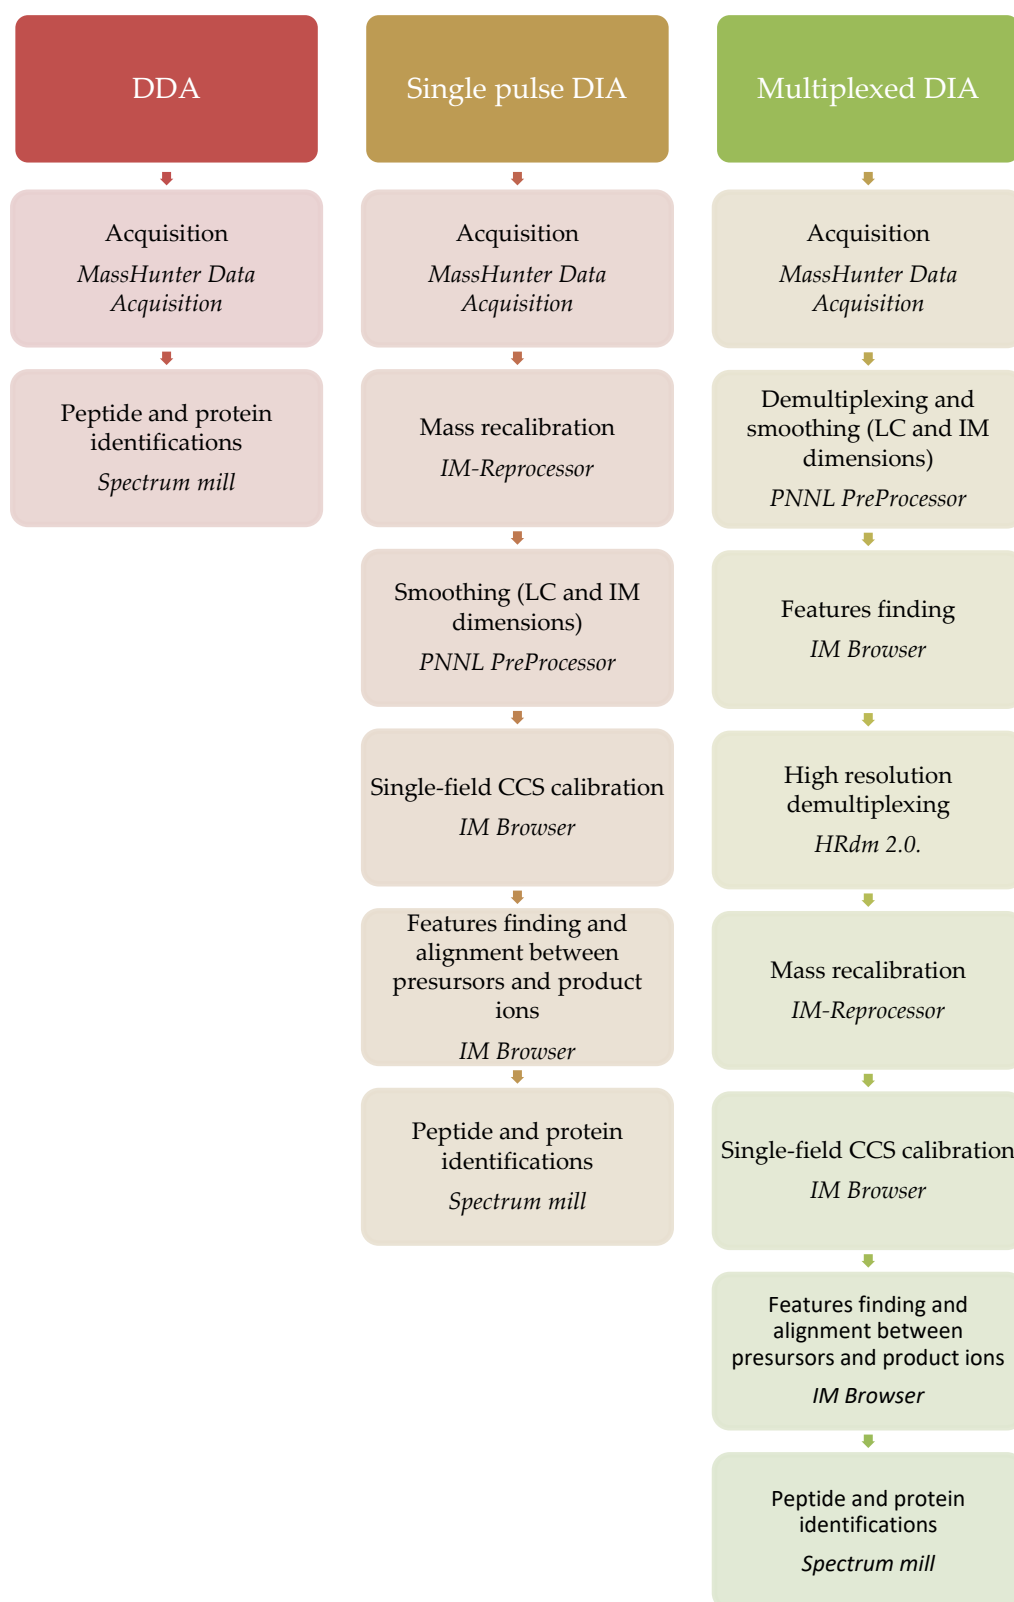

**Figure S3.** Principle of single pulse DIA and multiplexed DIA. In single pulse DIA: one packet of ions into the drift tube during each IM cycle. In multiplexed DIA: several packets of ions introduced into the drift tube during each IM cycle. Green, red and yellow dots represent different types of ions.

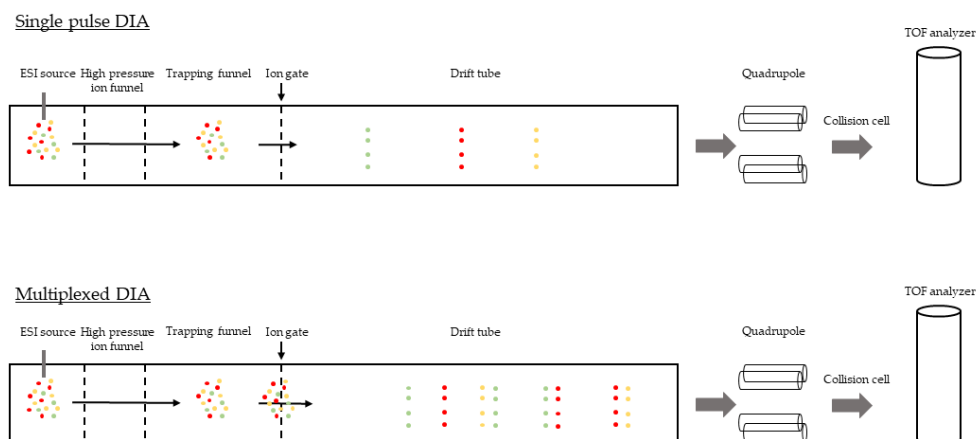

**Table S1.** Pairs of non-isomeric coeluting isobaric peptides that could be separated thanks to the ion-mobility dimension. RT= retention time; DT= drift-time; CCS= collision-cross section. Cysteines are carbamidomethylated (fixed modification).

| Sequence                                 | m/z      | RT (min) | DT (ms) | CCS     | Charge | Variable Modifications             |
|------------------------------------------|----------|----------|---------|---------|--------|------------------------------------|
| VLYGLFCKHTQK                             | 498.5978 | 61.10    | 20.68   | 455.49  | 3      |                                    |
| YGFTHLSTGELLR                            | 498.5987 | 61.11    | 22.58   | 498.36  | 3      |                                    |
| YDLYEKTLYnSDLLnSnR                       | 588.7894 | 42.80    | 23.04   | 675.94  | 4      | Deamidation                        |
| SFSLGDIYFK                               | 588.7891 | 43.02    | 20.89   | 307.59  | 2      |                                    |
| FPIYHLLSGNLLNR                           | 590.6625 | 74.43    | 23.01   | 507.29  | 3      |                                    |
| RAnPHFKSFPVLEAR                          | 590.6626 | 74.45    | 24.25   | 535.31  | 3      | Deamidation                        |
| IGSEIGCYQGFAFAWK                         | 611.9697 | 66.55    | 27.20   | 601.58  | 3      |                                    |
| TYFPFDLSHGSAQVK                          | 611.9713 | 66.57    | 21.93   | 482.85  | 3      |                                    |
| GTVVVPTLDSVLYDNQEFDPDEK                  | 620.6704 | 89.53    | 26.69   | 590.13  | 3      |                                    |
| qSSKLYGSIFTGASKFR                        | 620.6703 | 89.54    | 23.57   | 519.90  | 3      | Pyroglutamic acid                  |
| VHTGEKPYECFECPK                          | 627.6176 | 79.36    | 25.47   | 562.64  | 3      |                                    |
| DTYSDEHFWVTLnR                           | 627.6186 | 79.46    | 23.00   | 506.90  | 3      | Deamidation                        |
| QYGGFDnRGLEPGHR                          | 634.3355 | 63.24    | 22.74   | 501.05  | 3      |                                    |
| NLYGAKSLELPFQGAHR                        | 634.3360 | 63.26    | 21.88   | 481.58  | 3      |                                    |
| GYWTQLSmlIPGPGFSR                        | 642.6581 | 74.91    | 22.63   | 498.52  | 3      | Oxidized methionine                |
| FSFHTNVLEDnIGYLR                         | 642.6559 | 74.91    | 24.26   | 535.20  | 3      | Deamidation                        |
| ELISNSSDALDK                             | 646.3233 | 43.34    | 25.93   | 383.19  | 2      |                                    |
| DKYPLSEnHNNnTFLK                         | 646.3150 | 43.59    | 24.49   | 540.35  | 3      | Deamidation                        |
| IAEIFHLNSVSGEVSILK                       | 652.6960 | 64.28    | 20.96   | 460.80  | 3      |                                    |
| VAPEEHPTLLTEAPLNPK                       | 652.6963 | 64.32    | 25.02   | 552.24  | 3      |                                    |
| ELTVYGnPICRKMHLR                         | 663.3478 | 67.52    | 24.67   | 544.21  | 3      | Deamidation                        |
| ILGPmFISQVYAHWGPR                        | 663.3466 | 67.57    | 23.41   | 515.85  | 3      | Oxidized methionine                |
| HPNTLLRRGAFLSYSQK                        | 663.3665 | 89.10    | 23.95   | 528.19  | 3      |                                    |
| IASLDAAnARLMSALTQLK                      | 663.3663 | 89.11    | 26.09   | 576.30  | 3      | Deamidation                        |
| YFHRIDnFLK                               | 677.3394 | 53.16    | 20.53   | 301.69  | 2      | Deamidation                        |
| DIISDTSGDFRK                             | 677.3366 | 53.16    | 26.76   | 395.51  | 2      |                                    |
| GRnnmFHTLLmFLYIIK                        | 715.6863 | 89.34    | 23.52   | 518.18  | 3      | Deamidation<br>Oxidized methionine |
| qISDVERDVQNFPAAATDEK                     | 715.6890 | 89.37    | 26.39   | 582.78  | 3      | Pyroglutamic acid                  |
| QmGYPVLNVnGVKnITQKR                      | 726.3880 | 83.45    | 25.25   | 557.08  | 3      | Deamidation<br>Oxidized methionine |
| EIIVFVESFIYKHPQEAK                       | 726.3866 | 83.48    | 27.71   | 612.49  | 3      |                                    |
| YTLNLFVPRnLFEQFHR                        | 732.3954 | 78.58    | 25.08   | 553.22  | 3      | Deamidation                        |
| HQLVLDHHVKGHGGTRLYK                      | 732.3953 | 78.60    | 26.89   | 593.93  | 3      |                                    |
| TMNLNPmILTNILSSPYFK                      | 738.3766 | 82.04    | 24.79   | 546.74  | 3      | Oxidized methionine                |
| VIISAPSADAPMFVMGVNHEK                    | 738.3762 | 82.04    | 27.43   | 606.06  | 3      |                                    |
| QHGTYRQIFHPEQLITGKEDAAAnnYA<br>WGHYTIGK  | 789.9824 | 84.11    | 27.46   | 1008.36 | 5      | Deamidation                        |
| TSEIEPKnSPEDLGLSLTGDSCKLmLS<br>TSEYSQSPK | 789.9829 | 84.11    | 29.25   | 1075.21 | 5      | Deamidation<br>Oxidized methionine |
| QYEHVKRDLNPEDFWEIIGELGDGA<br>FGK         | 816.3870 | 121.64   | 26.98   | 792.84  | 4      |                                    |
| QYEHVKRDLNPEDFWEIIGELGDGA<br>FGK         | 816.3861 | 121.64   | 24.92   | 731.28  | 4      |                                    |
| GSAGPCCTPTKMSPInmLYFNGKEQI<br>IYK        | 845.6613 | 80.46    | 27.00   | 793.41  | 4      | Deamidation<br>Oxidized methionine |

|                                          |           |        |       |        |   |                                       |
|------------------------------------------|-----------|--------|-------|--------|---|---------------------------------------|
| SYVEGFQDPMKEFWLGLDKLHNLTT<br>GTPAR       | 845.6621  | 80.51  | 24.40 | 715.69 | 4 |                                       |
| HSTINIVDIYPMCHILGLKPHPnNG<br>TFGHTK      | 911.6913  | 96.27  | 29.47 | 867.06 | 4 |                                       |
| DLSKTIIDnSPQAFAYQLSnGIPIESW<br>FMDK      | 911.6933  | 96.30  | 26.08 | 765.71 | 4 |                                       |
| SLDLNCEVTNLNDYR                          | 986.9602  | 91.31  | 31.73 | 468.85 | 2 |                                       |
| FYLTPPQVnSILK                            | 986.9578  | 91.32  | 28.32 | 417.63 | 2 | Deamidation                           |
| IPTLEEGLQLPSPTATSQLPLESDAV<br>ECLNYQHYK  | 1014.5142 | 112.62 | 33.14 | 976.56 | 4 |                                       |
| WIISDGPVDALWIEnmNTVLDDnKm<br>LCLANSERIK  | 1014.5148 | 112.63 | 28.87 | 848.75 | 4 | Deamidation<br>Oxidized<br>methionine |
| INFTLRVHDVLFQDVWLCSGQSnmQ<br>mTVLQIFnATR | 1062.0015 | 112.74 | 27.13 | 796.54 | 4 | Deamidation<br>Oxidized<br>methionine |
| EAVEKEFEPLLnWmKDK                        | 1062.0024 | 112.75 | 28.70 | 423.21 | 2 | Deamidation<br>Oxidized<br>methionine |

**Table S2.** List of the 60 peptides used to compare single pulse and multiplexed DIA. Cysteines are carbamidomethylated (fixed modification).

| Sequence           | m/z      | RT<br>(min) | Charge |
|--------------------|----------|-------------|--------|
| IGAEVYHNLK         | 381.8773 | 39.10       | 3      |
| FSMPGFK            | 407.2012 | 63.60       | 2      |
| VIFGLFGK           | 440.7693 | 85.10       | 2      |
| GLFIIDDK           | 460.7536 | 68.66       | 2      |
| LPLQDVYK           | 488.2766 | 52.68       | 2      |
| DLPLLLFR           | 493.8033 | 104.13      | 2      |
| VFLENVIR           | 495.2872 | 68.77       | 2      |
| SLTNDWEDHLAVK      | 509.9208 | 65.40       | 3      |
| VSFELFADK          | 528.2734 | 76.77       | 2      |
| MFLSFPTTK          | 536.2815 | 76.23       | 2      |
| LHFFMPGFAPLTSR     | 540.9504 | 98.57       | 3      |
| EIIDLVLDR          | 543.3117 | 83.04       | 3      |
| LSELEAALQR         | 565.3106 | 59.47       | 2      |
| ISGLIYEETR         | 590.8131 | 53.02       | 2      |
| VIGSGCNLDSAR       | 624.7977 | 35.88       | 2      |
| AGKPVICATQMLESNIK  | 626.3317 | 101.98      | 3      |
| DFMIQGGDFTR        | 643.7932 | 67.89       | 2      |
| TVTAMDVVYALK       | 655.8593 | 87.45       | 2      |
| ITLPVDFVTADK       | 659.8632 | 83.44       | 2      |
| SLDMDSIAEVK        | 660.8454 | 89.16       | 2      |
| GFAFVQYVNER        | 665.3420 | 76.28       | 2      |
| YALYDATYETK        | 669.3175 | 52.55       | 2      |
| FLSQPFQVAEVFTGHMGK | 675.0104 | 103.79      | 3      |
| NTGIICTIGPASR      | 680.3583 | 52.53       | 2      |
| IQTQPGYANTLR       | 681.3673 | 41.56       | 2      |
| SEPIPESNDGPVK      | 684.8369 | 37.53       | 2      |
| LLTSFLPAQLLR       | 686.4249 | 108.15      | 2      |

|                           |           |        |   |
|---------------------------|-----------|--------|---|
| ALMLQGVDLLADAVAVTMGPK     | 705.0622  | 123.47 | 3 |
| DICNDVLSLLEK              | 709.8705  | 112,63 | 2 |
| ILTFDQLALDSPK             | 730.9014  | 85.22  | 2 |
| LICCDILDVLDK              | 738.8755  | 99.55  | 2 |
| SETAPAAPAAAPPAEK          | 760.8797  | 37.99  | 2 |
| LVQSPNSYFMDVK             | 764.3793  | 68.55  | 2 |
| VPTANVSVDLTCR             | 765.8994  | 63.81  | 2 |
| ADQLTEEQIAEFK             | 782.3913  | 76.06  | 2 |
| IQPSGGTNINEALLR           | 791.9331  | 53.11  | 2 |
| SETAPAETATPAPVEK          | 820.9050  | 39.32  | 2 |
| DPVQEAWAEDVDLR            | 821.8834  | 77.42  | 2 |
| GTDIMYTGTLDCWR            | 844.8781  | 77.94  | 2 |
| AAGVNVEPFWPGLFAK          | 851.9423  | 107.65 | 2 |
| GCITIIGGGDTATCCAK         | 877.8944  | 51.35  | 2 |
| DCDLQEDACYNCGR            | 888.3182  | 39.92  | 2 |
| SYELPDGQVITIGNER          | 895.9506  | 78.95  | 2 |
| LEAELGNMQGLVEDFK          | 896.9475  | 96.86  | 2 |
| EKPYPPIPEEYTFIQNVPLEDR    | 908.8025  | 102.85 | 3 |
| MTDQEAIQDLWQWR            | 910.4303  | 104.58 | 2 |
| SNMDNMFESYINNLR           | 924.3993  | 103,63 | 2 |
| YVASYLALGGSPPSAK          | 934.9900  | 96.78  | 2 |
| TDITYPAGFMDVISDK          | 943.4650  | 102.42 | 2 |
| MEDSMDMDMSPLRPQNYLFGCELK  | 983.7589  | 111.62 | 3 |
| SLDLFNCEVTNLNDYR          | 986.9519  | 91.19  | 2 |
| AAFDDAIAELDTLSEESYK       | 1044.4826 | 110.27 | 2 |
| MVNPTVFFDIAVDGEPLGR       | 1060.033  | 122.23 | 2 |
| EMEENFAVEAANYQDTIGR       | 1093.9890 | 76.56  | 2 |
| DLYANTVLSGGTMYPGIADR      | 1108.0494 | 83,69  | 2 |
| GVVPLAGTNGETTTQGLDGLSER   | 1136.5656 | 69.05  | 2 |
| DGELPVEDDIDLSDELDDLK      | 1201.0574 | 99.46  | 2 |
| GFEVVMTEPIDEYCVQQLK       | 1224.5667 | 93.09  | 2 |
| LNSNTQVVLLSATMPSDVLEVTK   | 1230.1526 | 100.82 | 2 |
| TALLDAAGVASLLTTAEVVVTEIPK | 1241.6861 | 124.68 | 2 |
